# Supplementary material
Source: ML conference proceedings conference paper supplement (https://openreview.net/forum?id=QZDmftWNAMJ)
Supplement: supplementary_material [file attachment]

## 1 A Image generation

### 2 A.1 Architecture specification

3 The generator architecture is implemented with several MAT Residual Blocks followed by bilinear  
4 upsampling as shown in Figure 1(b). The architecture of the residual block is largely implemented  
5 from [?] where we replace the SPADE module with MAT in SPADE Residual block. We also leverage  
6 the Spectral Normalization [?] to all the convolution layers in the generator. The latent mapping  
7 network  $g$  for generating the latent code  $\mathbf{w}$  is implemented with an 8-layer of MLP with channel-wise  
8 normalization at the first layer, which is the same as the style mapping function in StyleGAN [?  
9 ]. The first MLP layer of the latent mapping function is different from the physical environment  
10 as the number of the input state,  $ns$ , is different. The dimension of the input state is increased  $2L$   
11 times by a high frequency positional encoding function  $\psi$ . We set the hyperparameter  $L$  as 10 and  
12 concatenate the input and output of  $\psi$ , which leads to 21 times increase in the channel dimension.  
13 The specification of the entire architecture is shown in Figure 2.

| Environment | Cheetah<br>run | Walker<br>walk | Cartpole<br>swingup | Finger<br>spin | Ball-in-cup<br>cath | Reacher<br>easy |
|-------------|----------------|----------------|---------------------|----------------|---------------------|-----------------|
| $ns$        | 17             | 24             | 5                   | 9              | 8                   | 6               |

Table 1: The number of the state according to the environment of DMControl.

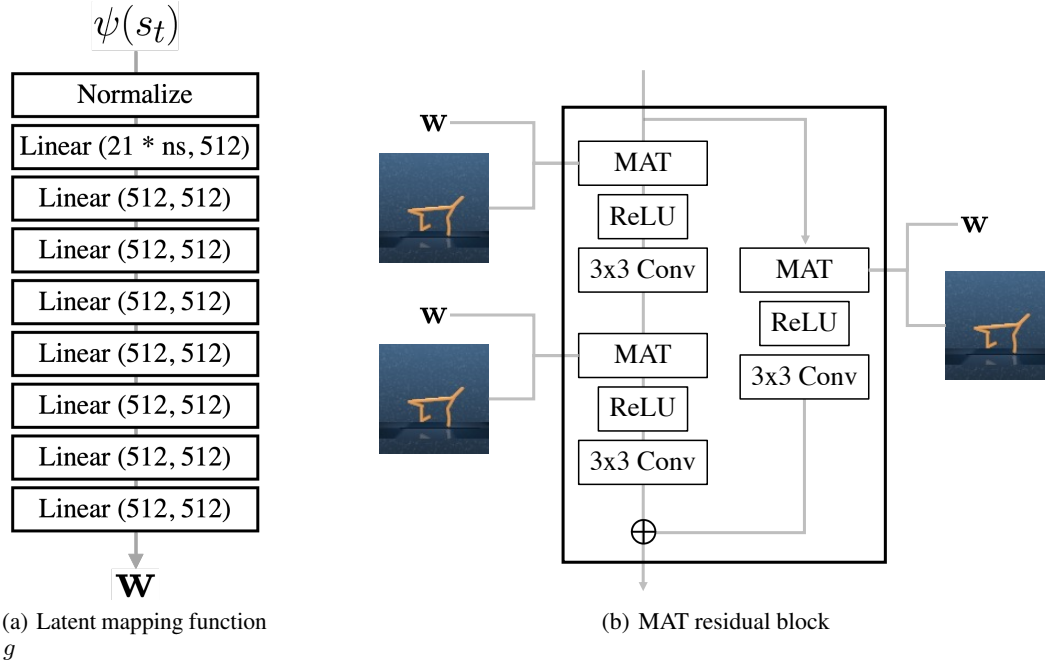

Figure 1: An architecture of the sub-network in the generator.

### 14 A.2 Training details

15 We implement our proposed generator architecture with the public deep learning platform PyTorch  
16 and train it on a single NVIDIA RTX A6000 GPU. We train 30 epochs for each task and the generated  
17 image size is set to  $128 \times 128$ . An Adam optimizer [?] with the learning rate of 0.0002 is utilized  
18 and the batch size is set to 16.

### 19 A.3 Additional results of image synthesis

20 We report additional qualitative results on the multiple environments of DMControl in Figure 3.  
21 We show that our proposed S2P generates high-quality images regardless of the environment. We

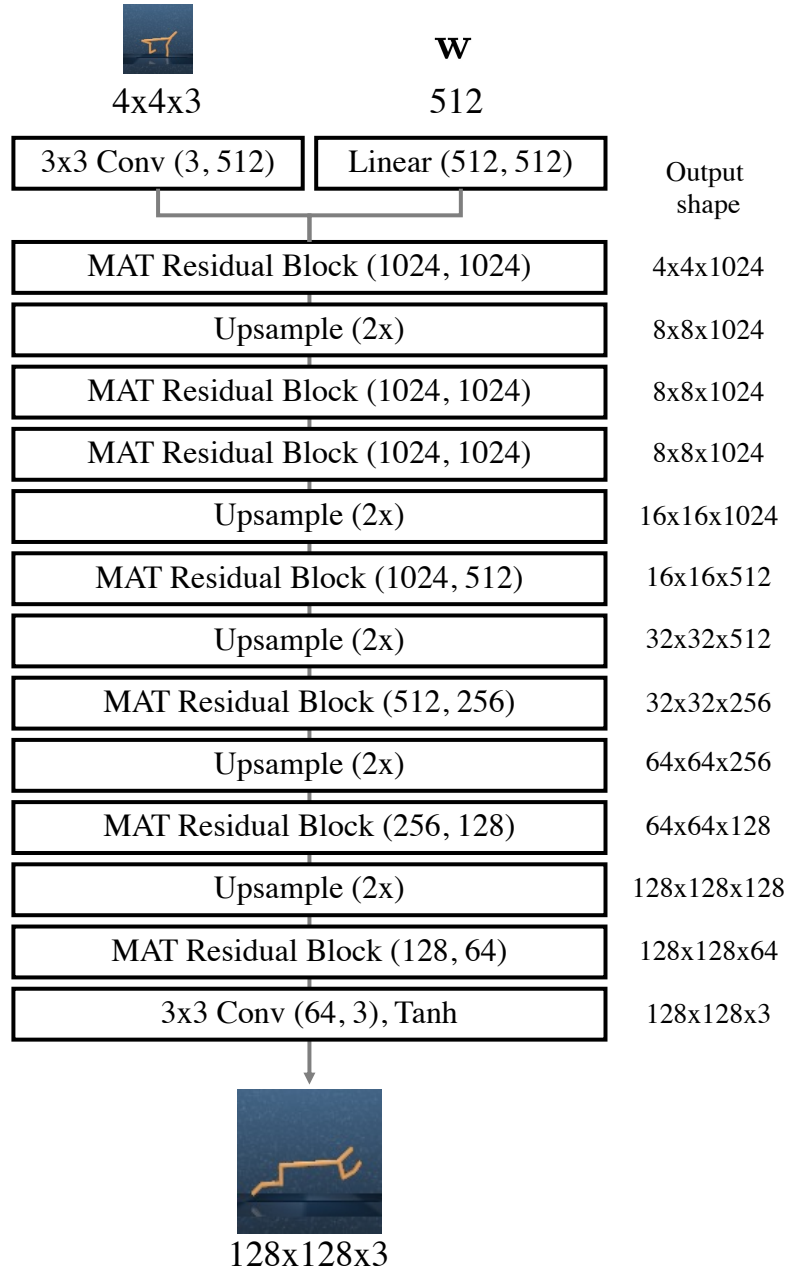

Figure 2: Specification of the generator.

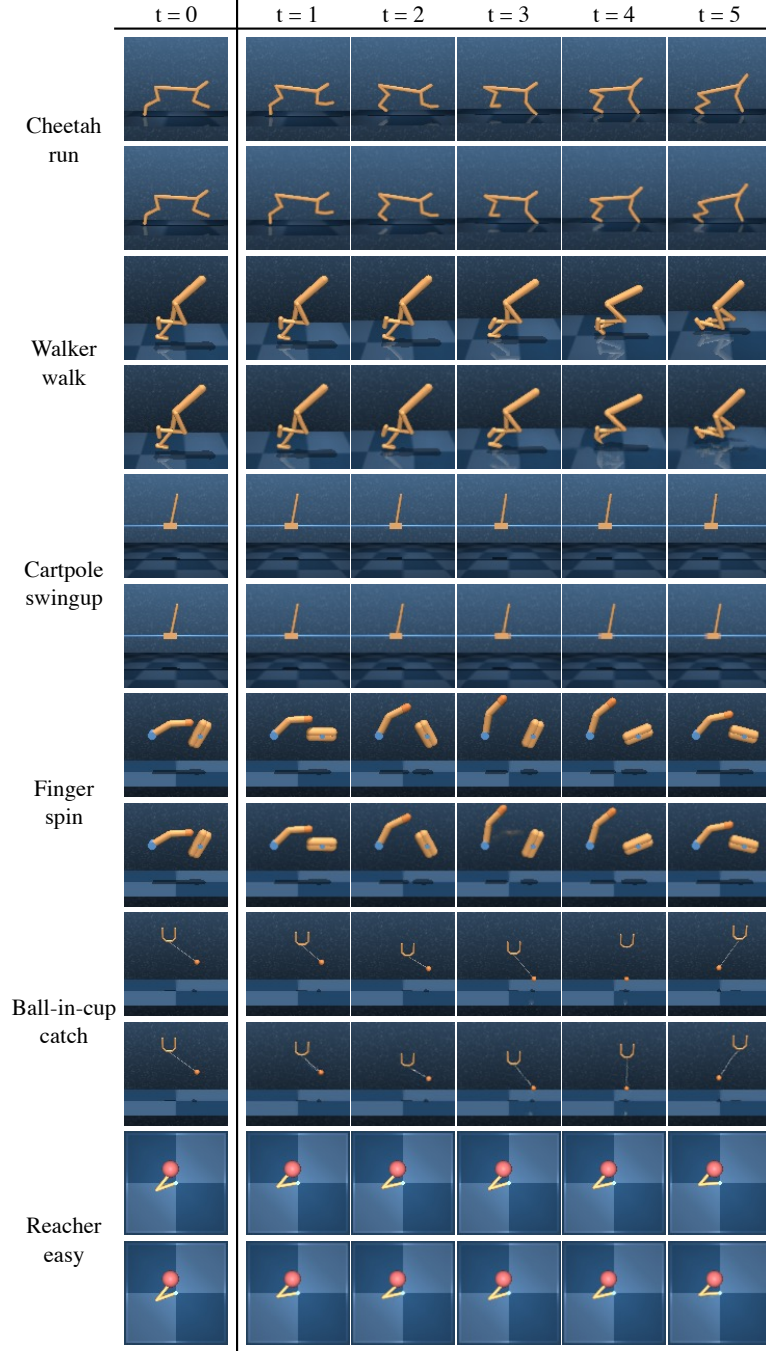

Figure 3: Additional qualitative results on the DMControl environment. The first row of each environment is ground truth images and the second row is the synthesized images from S2P.

| Environment       | Method  | FID ( $\downarrow$ ) | LPIPS ( $\downarrow$ ) | PSNR ( $\uparrow$ ) | SSIM ( $\uparrow$ ) |
|-------------------|---------|----------------------|------------------------|---------------------|---------------------|
| Cheetah run       | Dreamer | 63.46                | 0.042                  | 27.62               | 0.90                |
|                   | S2P     | 47.70                | 0.028                  | 33.40               | 0.94                |
| Walker walk       | Dreamer | 209.99               | 0.30                   | 18.38               | 0.69                |
|                   | S2P     | 74.08                | 0.078                  | 25.20               | 0.84                |
| Cartpole swingup  | Dreamer | 82.02                | 0.129                  | 28.05               | 0.94                |
|                   | S2P     | 112.81               | 0.117                  | 28.83               | 0.86                |
| Ball-in-cup catch | Dreamer | 112.45               | 0.055                  | 33.25               | 0.93                |
|                   | S2P     | 77.11                | 0.035                  | 33.75               | 0.97                |
| Reacher easy      | Dreamer | 171.92               | 0.115                  | 27.64               | 0.95                |
|                   | S2P     | 58.34                | 0.178                  | 26.02               | 0.86                |
| Finger spin       | Dreamer | 86.63                | 0.112                  | 21.93               | 0.90                |
|                   | S2P     | 18.86                | 0.025                  | 39.54               | 0.99                |
| Mean value        | Dreamer | 121.13               | 0.126                  | 28.19               | 0.89                |
|                   | S2P     | <b>64.82</b>         | <b>0.077</b>           | <b>31.13</b>        | <b>0.91</b>         |

Table 2: Quantitative results of generated images. S2P outperforms Dreamer in all the metrics for evaluating image quality.

recurrently generate a single trajectory exploiting the current state and the previous images which are also the output of the generator from the previous state. Also, we evaluate the quality of generated images quantitatively with metrics (FID score, LPIPS, PSNR, SSIM) which are frequently adopted for evaluating image quality in Table 2. Our S2P outperforms Dreamer in all the quantitative results which indicates the generated image from S2P has better quality than from Dreamer.

## B Offline RL Experiments Details

### B.1 Algorithm

---

#### Algorithm 1 Offline RL with the S2P

---

**Input:** offline dataset  $D$ , state rollout distribution  $\eta(\cdot|s)$ .

Train the probabilistic dynamics models  $\hat{T}_\theta(s', r|s, a) = \mathcal{N}(\mu_\theta(s, a), \Sigma_\theta(s, a))$  on  $D$ .

Train the image generator  $G(s_t, I_{t-1})$  on  $D$ .

**for**  $i = 1$  **to**  $K$  **do**

    Randomly sample  $I_0, s_0 \sim D$ .

    Get  $\tau_s \sim (s_0, a_0, r_0, s_1, \dots, s_M)$  by using the  $\eta(\cdot|s)$  and  $\hat{T}_\theta(s', r|s, a)$ .

    Generate  $\tau_I \sim (I_0, a_0, r_0, I_1, \dots, I_M)$  from  $\tau_s$  by  $G$ .

    Save  $\tau_I$  in  $D_{model}$ .

**end for**

Apply any offline RL algorithm with the dataset sampled from  $D, D_{model}$  with the ratio of  $f, 1 - f$ .

---

### B.2 Ablation studies

#### B.2.1 Uncertainty types

We conduct experiments on how the choice of the uncertainty affects the performance. We denote  $u(s, a) = \max_{i=1, \dots, N} \|\Sigma_\theta^i(s, a)\|_F$  as **Max Var**,  $u(s, a) = \max_{i=1, \dots, N} \|\mu_\theta^i(s, a) - \frac{1}{N} \sum_{j=1}^N \mu_\theta^j(s, a)\|_2$  as **Ens Var**, and average value of both uncertainty types as **Average Both**. In practice, we found that **Max Var** achieves better performance compared to other types of uncertainty in mixed, expert dataset, while **Ens Var** achieves better at random dataset. We hypothesize that the dynamics model is quite uncertain in the aspect of the **Max Var** on the random dataset due to the excessive randomness of the data. Thus, it could induce excessive penalty on the predicted reward when **Max Var** is used, and the agent could become too conservative.

| DATASET                  | METHOD   | MAX VAR      | AVERAGE BOTH | ENS VAR      |
|--------------------------|----------|--------------|--------------|--------------|
| CHEETAH<br>RUN<br>RANDOM | IQL      | 12.64        | 16.61        | <b>19.27</b> |
|                          | CQL      | 11.77        | 8.59         | <b>19.83</b> |
|                          | SLAC-OFF | 18.14        | 8.67         | <b>31.81</b> |
| CHEETAH<br>RUN<br>MIXED  | IQL      | 88.53        | <b>83.92</b> | 67.74        |
|                          | CQL      | <b>93.16</b> | 83.93        | 87.5         |
|                          | SLAC-OFF | <b>26.39</b> | <b>26.39</b> | 24.41        |
| CHEETAH<br>RUN<br>EXPERT | IQL      | <b>87.18</b> | 64.43        | 62.41        |
|                          | CQL      | <b>96.28</b> | 89.38        | 90.36        |
|                          | SLAC-OFF | <b>14.41</b> | 9.85         | 11.92        |

Table 3: Different types of uncertainty quantification on cheetah-run environments.

### 39 B.2.2 Rollout horizons

40 To validate the effectiveness of different rollout horizons, we conduct experiments with horizon  
41 length 1 (**+S2P (1step)**) and 5 (**+S2P (5step)**), while following the same rollout strategies in ???. For  
42 the 5 step case, as the proposed S2P generator is conditioned on the previous timestep’s image to  
43 synthesize the next image, we recurrently generate the image transition data. That is, at the first  
44 timestep, the ground truth image is conditioned on the image generator, but after then, the generated  
45 image is conditioned on the image generator for generating the following timestep’s image. The  
46 results shown in Table 4 represent that the augmentation with a longer horizon also has advantages in  
47 offline RL, but a short horizon is more effective overall. This is due to the uncertainty accumulation  
48 effect as shown in Figure 4. The average uncertainty grows as the rollout horizon increases due  
49 to the model bias, and it leads to more penalties on the predicted rewards, which can induce a too  
50 conservative agent.

| DATASET                  | METHOD   | 50K DATASET | +S2P (1STEP) | +S2P (5STEP) |
|--------------------------|----------|-------------|--------------|--------------|
| CHEETAH<br>RUN<br>RANDOM | IQL      | 10.28       | <b>12.64</b> | 12.08        |
|                          | CQL      | 4.89        | <b>11.77</b> | 11.46        |
|                          | SLAC-OFF | 16.37       | 18.14        | <b>19.09</b> |
| CHEETAH<br>RUN<br>MIXED  | IQL      | 41.68       | <b>88.53</b> | 66.38        |
|                          | CQL      | 92.63       | <b>93.16</b> | 87.44        |
|                          | SLAC-OFF | 16.63       | 26.39        | <b>27.07</b> |
| CHEETAH<br>RUN<br>EXPERT | IQL      | 79.89       | <b>87.18</b> | 81.01        |
|                          | CQL      | 94.20       | <b>96.28</b> | 87.53        |
|                          | SLAC-OFF | 8.92        | 14.41        | <b>17.17</b> |

Table 4: Effect of rollout horizons in cheetah-run environment.

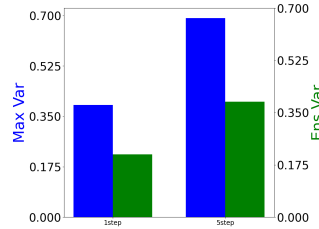

Figure 4: Average uncertainty of each different rollout horizon in cheetah-run environment.

### 51 B.2.3 Results on policy constraint-based methods

52 We additionally test the proposed method on the policy constraint-based methods such as BEAR [?] ]  
53 and behavior cloning (BC) on the cheetah-run environment. As shown in Table 5, the performance  
54 of these methods with augmented data is worse than the results of non-augmented data. The poor  
55 performance is reasonable, because BEAR utilizes the action distribution’s support matching by  
56 MMD, and BC is trained with maximizing the likelihood of the action. As the augmented action  
57 distributions are totally different from the behavior policy that induces the offline dataset, these two  
58 methods perform poorly because these methods try to clone or match both types of actions. That is,

these methods try to clone or match the support of the given offline dataset and sampled actions that could have different distribution or support.

| DATASET           | METHOD | 50K DATASET  | +S2P (RANDOM $\eta$ ) | +S2P (OFFRL $\eta$ ) |
|-------------------|--------|--------------|-----------------------|----------------------|
| CHEETAH<br>RANDOM | BEAR   | -1.15        | -1.39                 | <b>1.14</b>          |
|                   | BC     | -1.41        | -1.3                  | <b>2.54</b>          |
| CHEETAH<br>MIXED  | BEAR   | <b>10.64</b> | -0.29                 | 6.57                 |
|                   | BC     | <b>51.81</b> | 0.06                  | 5.17                 |
| CHEETAH<br>EXPERT | BEAR   | <b>73.49</b> | 11.11                 | 56.86                |
|                   | BC     | 77.42        | 30.06                 | <b>79.40</b>         |

Table 5: Experiments on policy constraint-based methods.

### B.3 Additional experiments on Dreamer and conventional image augmentation technique

**Dreamer with larger dataset.** To validate whether the performance degradation by augmentation from Dreamer (??) stems from the small dataset as the Dreamer requires more than 100k samples in online training, we collect an additional 250k dataset and augment the image transition amount of 250k by Dreamer (totally 500k datasets), and perform the same experiment. Despite the bigger size dataset, the performance does not increase overall (Table 6), and we could say that the inaccurate posture and quality of the images generated by the dreamer are attributed to the limited source of supervision from the uni-modal inputs rather than the size of the dataset, and it is not that proper for data augmentation in the offline setting.

**Comparison with the conventional image-augmentation technique.** To validate why S2P is needed instead of the conventional image-augmentation method, we additionally experiment with random crop and reflection padding, which is frequently used in image representation learning and online image RL. We perform the same experiment in ??, but replace the augmented images from S2P with randomly cropped images. Slightly better performance than Dreamer could be interpreted as it just manipulates the given true images (while maintaining the accurate posture of the agent) rather than generating new images like Dreamer (Table 6). But it still has difficulty in surpassing the S2P’s results as it cannot deviate from the state-action distribution of the offline dataset.

| DATASET                  | METHOD   | 50K DATASET | +S2P         | +REFLECT<br>RANDOMCROP | +DREAMER | +DREAMER<br>500k |
|--------------------------|----------|-------------|--------------|------------------------|----------|------------------|
| CHEETAH<br>RUN<br>MIXED  | IQL      | 41.68       | <b>88.53</b> | 70.17                  | 2.09     | 1.85             |
|                          | CQL      | 92.63       | <b>93.16</b> | 79.78                  | 58.93    | 82.55            |
|                          | SLAC-OFF | 16.63       | <b>26.39</b> | 3.10                   | 4.68     | 0.14             |
| WALKER<br>WALK<br>MIXED  | IQL      | 96.07       | <b>95.49</b> | 95.39                  | 1.28     | 7.21             |
|                          | CQL      | 97.18       | <b>97.84</b> | 97.61                  | 95.88    | 97.70            |
|                          | SLAC-OFF | 29.02       | <b>92.60</b> | 17.13                  | 52.65    | 0.48             |
| CHEETAH<br>RUN<br>EXPERT | IQL      | 79.89       | <b>87.18</b> | 68.39                  | 73.23    | 3.50             |
|                          | CQL      | 94.20       | <b>96.28</b> | 94.01                  | 53.69    | 27.58            |
|                          | SLAC-OFF | 8.92        | <b>14.41</b> | 8.15                   | 3.65     | 3.24             |
| WALKER<br>WALK<br>EXPERT | IQL      | 94.34       | <b>94.97</b> | 92.46                  | 34.95    | 37.92            |
|                          | CQL      | 95.43       | <b>97.97</b> | 97.11                  | 96.14    | 82.51            |
|                          | SLAC-OFF | 11.71       | <b>70.95</b> | 6.91                   | 52.03    | 10.43            |

Table 6: Quantitative comparison of S2P and other data augmentation methods.

### B.4 Visualization of the image distribution

To validate whether the S2P really affects the distribution of the offline dataset, we visualized the cheetah-run-expert dataset and the S2P-based augmented dataset by the random policy by applying the t-sne (Figure 5).

As shown in Figure 5, the augmented dataset not only occupies a similar area to the original dataset but also encloses the original dataset, even connecting the clusters of the original dataset. It can be

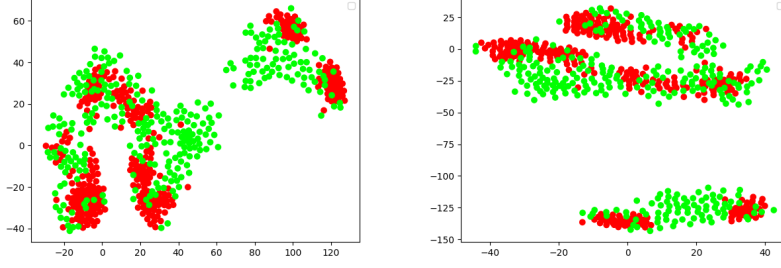

Figure 5: The t-sne visualizations examples of the cheetah-run-expert dataset (red) and the augmented dataset by the random policy (green).

84 interpreted that S2P connects different modes of image distribution by deploying virtual exploration  
85 in the state space.

## 86 B.5 Model learning

87 In state space, we represent the dynamics, reward model as a probabilistic neural network that outputs  
88 a Gaussian distribution over the next state and reward given the current state and action.

$$T_{\theta}(s_{t+1}, r_t | s_t, a_t) = \mathcal{N}(\mu_{\theta}(s_t, a_t), \Sigma_{\theta}(s_t, a_t)) \quad (1)$$

89 We train an ensemble of  $N$  dynamics models  $\{\hat{T}_{\theta} = \mathcal{N}(\mu_{\theta}(s, a), \Sigma_{\theta}(s, a))\}_{i=1}^N$ , with each model  
90 trained independently via maximum likelihood estimation on offline dataset  $D$ . We set the number of  
91 dynamics model  $N$  as 7 following ? ]. During model rollouts, we randomly pick one model. Each  
92 model in the ensemble is represented as 3 layers with 256 hidden units and relu activation function.

## 93 B.6 Representation learning

94 For image-based offline RL process, we follow ? ] that uses a variational model with the following  
95 components:

$$\begin{aligned} \text{Image encoder : } h_t &\sim E_{\theta}(I_t) \\ \text{Posterior : } z_t &\sim q_{\psi}(z_t | h_t, z_{t-1}, a_{t-1}) \\ \text{Prior : } z_t &\sim p_{\psi}(z_t | z_{t-1}, a_{t-1}) \\ \text{Image decoder : } I_t &\sim D_{\theta}(I_t | z_t) \\ \text{Policy : } a_t &\sim \pi(a_t | I_{1:t}, a_{1:t-1}) \end{aligned}$$

96 Full derivation of those equations are in ? ]. We train the representation model using the evidence  
97 lower bound :

$$\mathbb{E}_{z_{1:\tau+1} \sim q_{\psi}} \left[ \sum_{t=0}^{\tau} -\log p_{\psi}(I_{t+1} | z_{t+1}) + D_{KL}(q_{\psi}(z_{t+1} | I_{t+1}, z_t, a_t) || p_{\psi}(z_{t+1} | z_t, a_t)) \right]$$

98 where  $\tau$  is the number of sequences, and  $z$  is the latent representation. We set  $\tau = 8$  and the dimension  
99 of  $z$  is 288, same as the original implementation. For image encoder, we use 6 convolutional neural  
100 network with kernel sizes [5, 3, 3, 3, 3, 4] and strides [2,2,2,2,2,2] respectively with leaky relu  
101 activation function. The decoder is constructed in a symmetrical manner to the encoder. We pre-train  
102 the image encoder by 300k steps and use the trained encoder’s weights as initial weights when offline  
103 RL training proceeds.

## B.7 Training Detail

We use the batch size of 128 and the Adam optimizer for training the value function  $Q$  and policy  $\pi$  with the learning rates 0.0003, 0.0001, respectively. Each  $Q$  and  $\pi$  is represented as MLPs with hidden layer sizes (1024, 1024), relu activation function. We apply tanh activation on the output of the policy with reparameterization trick same as [1]. Also, we use the uncertainty penalty coefficient  $\lambda = 2$  for all environments except the finger-spin, which use  $\lambda = 1$ . The sampling ratio of the offline dataset is  $f = 0.5$ . For offline RL implementation, we referred to the original implementations of each work and follow default parameters.

## B.8 Zero-shot Task Adaptation Detail

For the **cheetah-jump** task, we relabel the reward in the given offline dataset to the sparse reward that indicates whether the cheetah is jumping or not. That is, if  $z - \text{init } z \geq 0.3$ , the reward is relabeled as 1, otherwise 0, where  $z$  denotes the z-position of the cheetah and  $\text{init } z$  denotes the initial z-position. For augmentation, we randomly select states whose z-position is greater than 0.2, and generate images from these states to encourage the jumping motion. Then, we augment these generated image transition data in the same way of [1], and evaluate the offline RL.

For the **walker-run** task, we generate the dataset in the same manner as the mixed type in [1]. That is, we train the state-based SAC until convergence, and we randomly sample trajectories from the replay buffer. Then, we generate  $\hat{I}_1$  from  $s_1$  and  $I_0$ , where  $I_0$  is the initial image when the agent is reset, and recurrently generate images  $\hat{I}_{t+1}$  from  $s_{t+1}, \hat{I}_t$  ( $t = 0, 1, \dots, N$ ) by the S2P generator trained with the **walker-walk-mixed** dataset. After then, we apply offline RL on these generated image transition data.

## B.9 Environment Detail

The DMControl’s environment details and the random and expert scores obtained by training the state-based SAC are shown in Table 7. The normalized score is computed by  $100 \times (\text{return} - \text{random score}) / (\text{expert score} - \text{random score})$ , which is proposed in [1].

| ENVIRONMENT       | EXPERT SCORE | RANDOM SCORE | ACTION REPEAT | MAXIMUM STEPS PER EPISODE |
|-------------------|--------------|--------------|---------------|---------------------------|
| CHEETAH-RUN       | 900          | 12.6         | 4             | 250                       |
| WALKER-WALK       | 970          | 43.2         | 2             | 500                       |
| BALL IN CUP-CATCH | 976          | 25.1         | 4             | 250                       |
| CARTPOLE-SWINGUP  | 979          | 61.8         | 8             | 125                       |
| REACHER-EASY      | 906          | 2.1          | 4             | 250                       |
| FINGER-SPIN       | 882          | 125.2        | 2             | 500                       |
| WALKER-RUN        | 790          | 25.2         | 2             | 500                       |

Table 7: The environment details including the expert and random scores for computing normalized scores.
